# Supplementary material
Source: PubMed Central journal article supplement (PMC8904043)
Supplement: aem.02303-21-s0001.pdf [file aem.02303-21-s0001.pdf]

1 **Supplemental Figures**

2

3

**Nanobody-Functionalized Cellulose for Capturing SARS-CoV-2**

4 Xin Sun<sup>1</sup>, Shaobo Yang<sup>1</sup>, Amal A. Al-Dossary<sup>2</sup>, Shana Broitman<sup>1</sup>, Yun Ni<sup>1</sup>, Ming Guan<sup>1</sup>,  
5 Mengdi Yang<sup>1</sup>, Jiahe Li<sup>1</sup>, \*

6 <sup>1</sup> Department of Bioengineering, Northeastern University, Boston, MA, United States,  
7 02115

8 <sup>2</sup> Department of Basic Sciences, Deanship of Preparatory Year and Supporting Studies,  
9 Imam Abdulrahman Bin Faisal University, Dammam, Saudi Arabia, 34212

10 \*Corresponding author: Jiahe Li, email: [jiah.li@northeastern.edu](mailto:jiah.li@northeastern.edu)

11

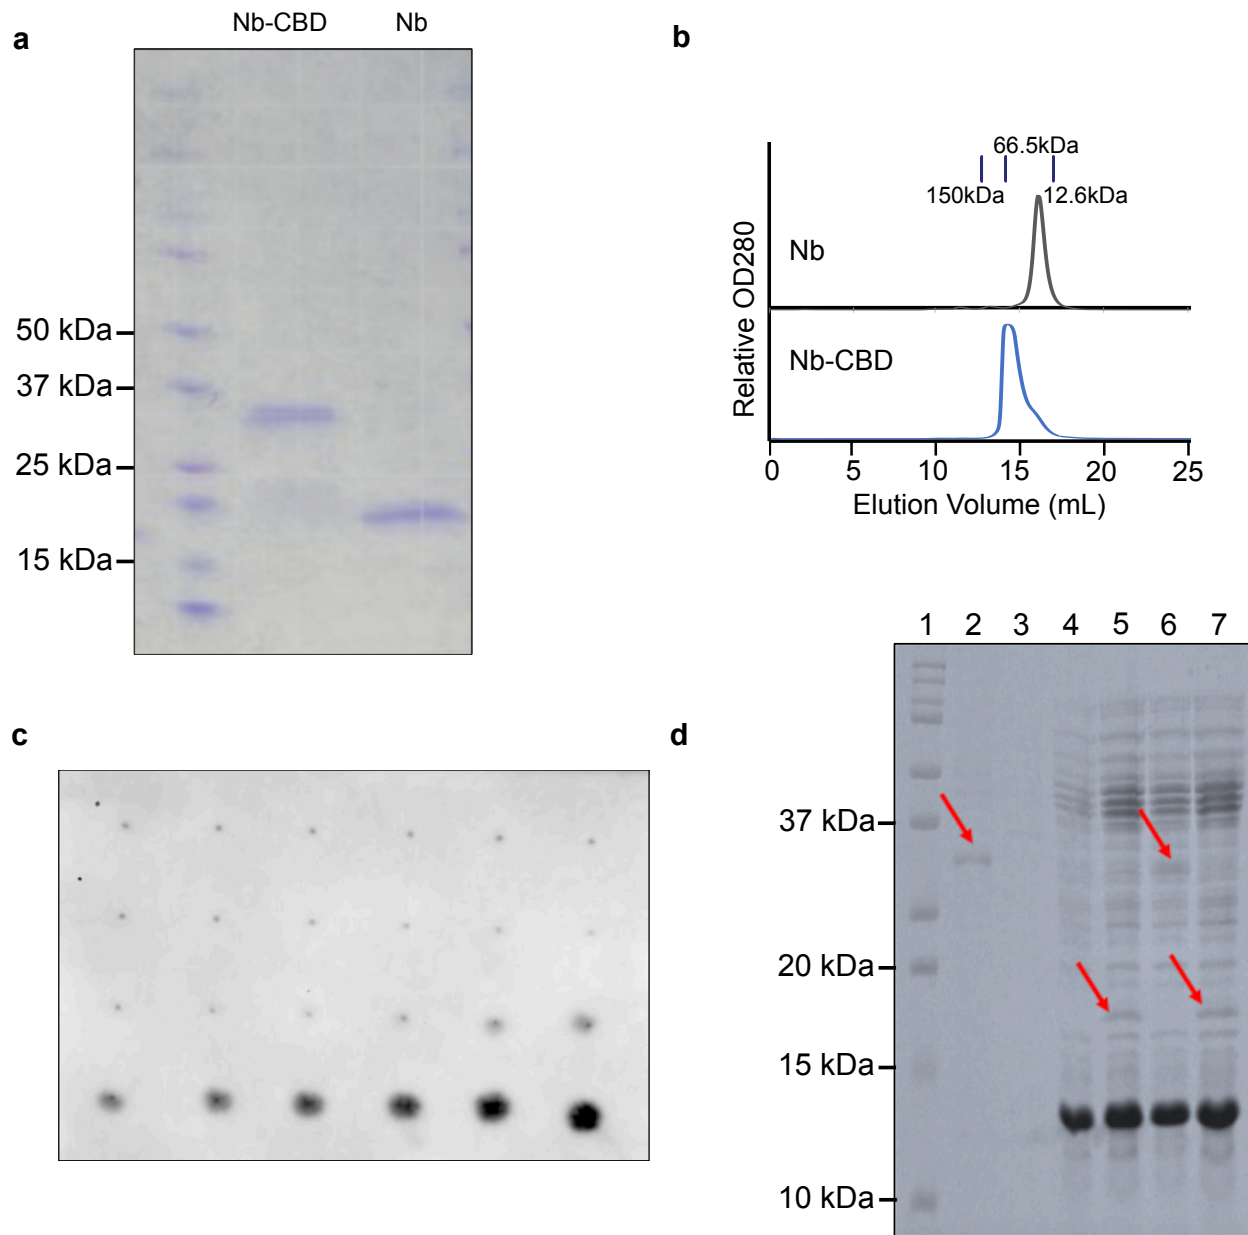

12  
 13 **Figure S1.** a) Denaturing SDS-PAGE of Nb and Nb-CBD. b) Size exclusion  
 14 chromatography of Nb and Nb-CBD. c) Quantification of maximum binding capacity per  
 15 unit area through spotting serially diluted Nb-CBD proteins on cellulose paper. Nb-CBD  
 16 proteins were detected by direct immunoblotting on cellulose paper via anti-  
 17 FLAG. d) Detection of Nb-CBD fusion proteins in the RAC column by SDS-PAGE. Total  
 18 *E. coli* lysate containing either Nb-CBD or Nb lacking the CBD were loaded onto a column

19 with 0.1 ml RAC, flow-throughs were obtained by gravity flow, and RAC (i.e. cellulose)  
20 were extracted to identify immobilized proteins by denaturing SDS-PAGE. A single band  
21 corresponding to Nb-CBD (Lane 2) was detected by the Coomassie blue staining, while  
22 Nb alone (Lane 3) was undetectable, indicating the binding specificity for cellulose in Nb-  
23 CBD is due to the CBD. In addition, Nb-CBD was not visualized in the flow-through  
24 fractions when preparing the RAC column (Lane 4) compared to the presence of Nb-CBD  
25 in the preload sample (Lane 6), suggesting efficient capture of Nb-CBD via the gravity  
26 flow mode. In contrast, Nb alone was present in both flow-through (Lane 5) and preload  
27 protein samples (Lane 7), which again validated the requirement of CBD for cellulose  
28 binding. Lane 1 refers to protein marker.

29

30

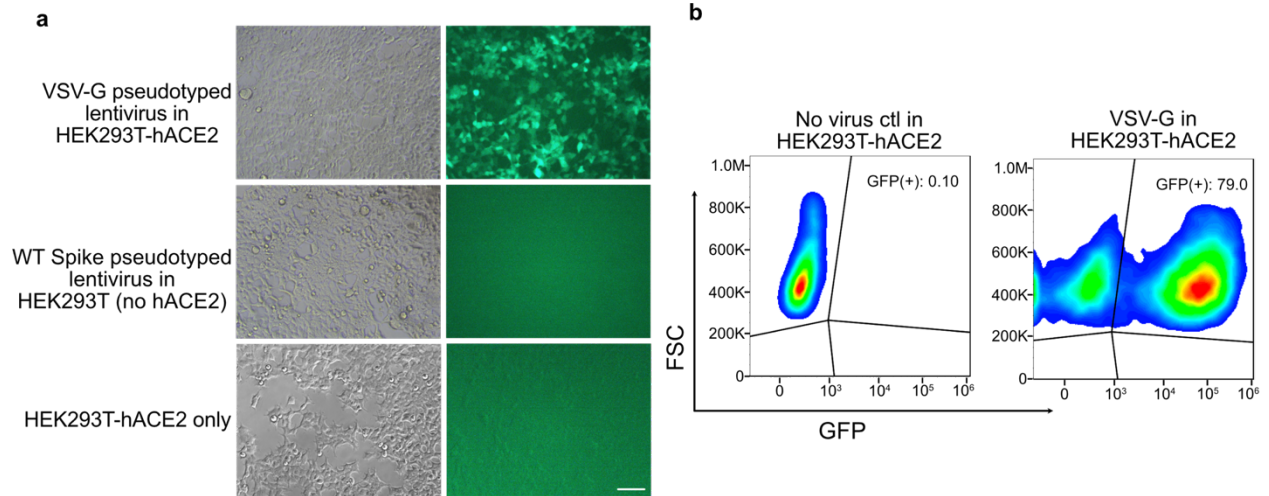

31

32 **Figure S2.** a) Microscopy images of HEK293T-hACE2 cells transduced with  
 33 lentivirus pseudotyped with vesicular stomatitis virus G (VSV G) protein (first panel);  
 34 HEK293T transduced with lentivirus pseudotyped with the SARS-CoV-2 WT Spike  
 35 (second panel); and HEK293T-hACE2 without any transduction (third panel). Scale bar=  
 36 100  $\mu\text{m}$ . b) Flow cytometry of GFP expression from VSV-  
 37 G pseudotyped lentivirus in HEK293T-hACE2 cells. Results are representative of three  
 38 independent experiments.

39

40
